# Supplementary material for: Energetics of C–N coupling reactions on Pt(111) and Ni(111) surfaces from application of density-functional theory
Source: Royal Society of Chemistry journal article supplement (doi:10.1039/c3cp50765c), 2013-01-01
Supplement: c3cp50765c.pdf [file c3cp50765c.pdf]

**Table S1.** Adsorption energies (eV) for the different layers and freeze of atomic C on Pt(111) and Ni(111) surface.

| Surfaces                       | $E_{\text{ads}}$ | Surfaces                       | $E_{\text{ads}}$ |
|--------------------------------|------------------|--------------------------------|------------------|
| Pt(111) 6 layers               | 7.47             | Ni(111) 6 layers               | 6.92             |
| Pt(111) 5 layers               | 7.41             | Ni(111) 5 layers               | 6.89             |
| Pt(111) 5 layers fixed 2 layer | 7.41             | Ni(111) 5 layers fixed 2 layer | 6.91             |

**Table S2.** Convergence tests for various cutoff energies for the calculated lattice constant of nickel and platinum bulk.

|         | 400 eV | 500 eV | 600 eV | exp value |
|---------|--------|--------|--------|-----------|
| Ni bulk | 3.52 Å | 3.52 Å | 3.52 Å | 3.51 Å    |
| Pt bulk | 3.99 Å | 3.99 Å | 3.99 Å | 3.92 Å    |

**Table S3.** Convergence tests for various Monkhorst-Pack  $k$ -points for the calculated lattice constant of nickel and platinum bulk.

|    | 3×3×3  | 4×4×4  | 5×5×5  | 6×6×6  | 7×7×7  | 8×8×8  | 9×9×9  | 10×10×10 |
|----|--------|--------|--------|--------|--------|--------|--------|----------|
| Ni | 3.51 Å | 3.52 Å | 3.52 Å | 3.51 Å | 3.52 Å | 3.52 Å | 3.52 Å | 3.51 Å   |
| Pt | 3.98 Å | 3.99 Å | 3.99 Å | 3.98 Å | 3.99 Å | 3.99 Å | 3.99 Å | 3.99 Å   |

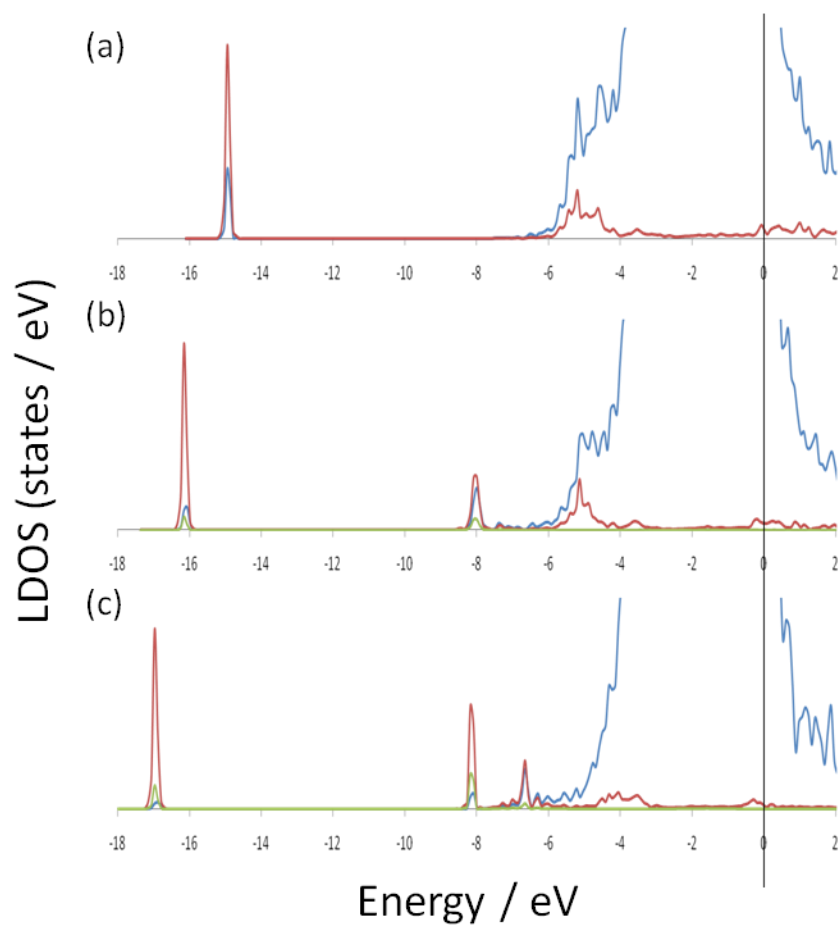

**Figure S1.** Local density of states (LDOS) for (a) N, (b) NH, and (c) NH<sub>2</sub> at fcc hollow site on Ni(111) surface. The blue, red and green lines represent d orbital of top layer Ni atoms, s and p orbital of N atom and H atom, respectively.

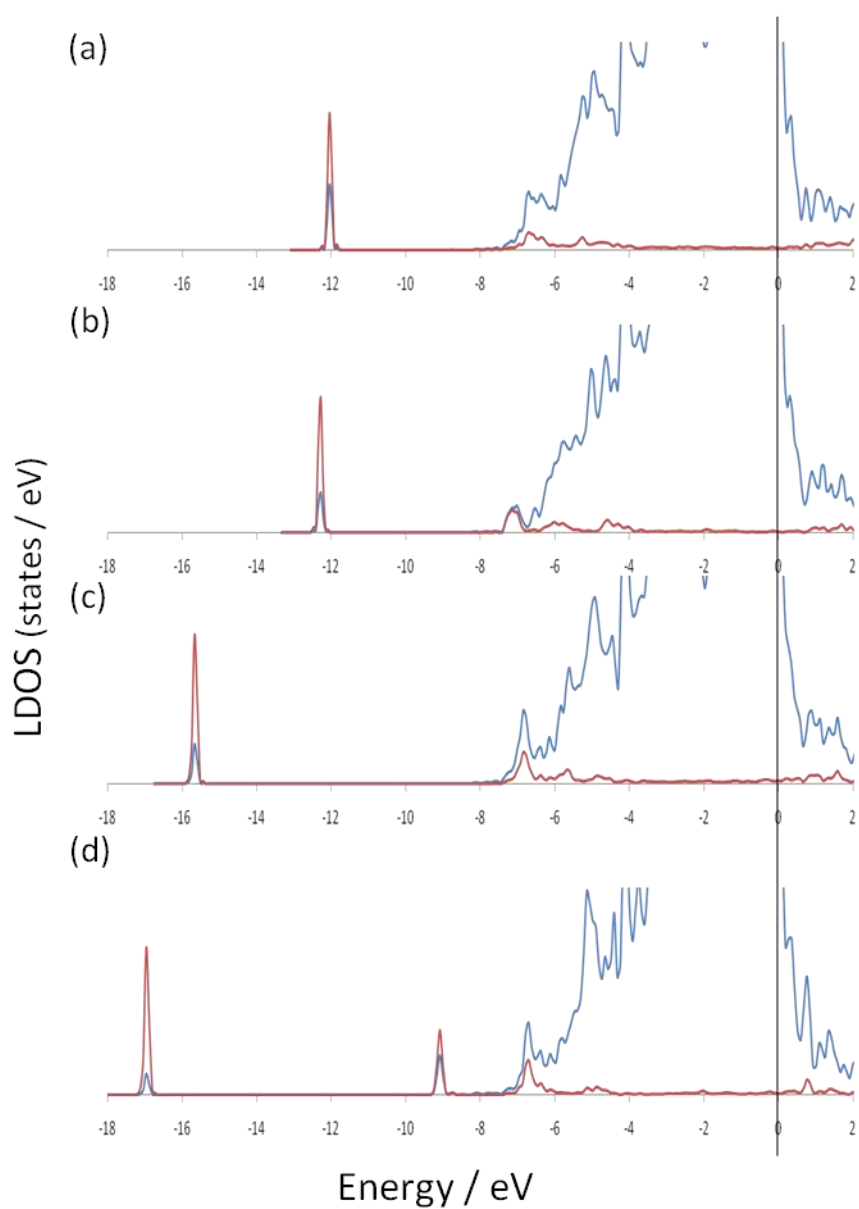

**Figure S2.** Local density of states (LDOS) for (a) C, (b) CH, (c) N, and (d) NH at fcc hollow site on Pt(111) surface. The blue and red lines represent d orbital of top layer Pt atoms and s and p orbital of C(N) atom, respectively.

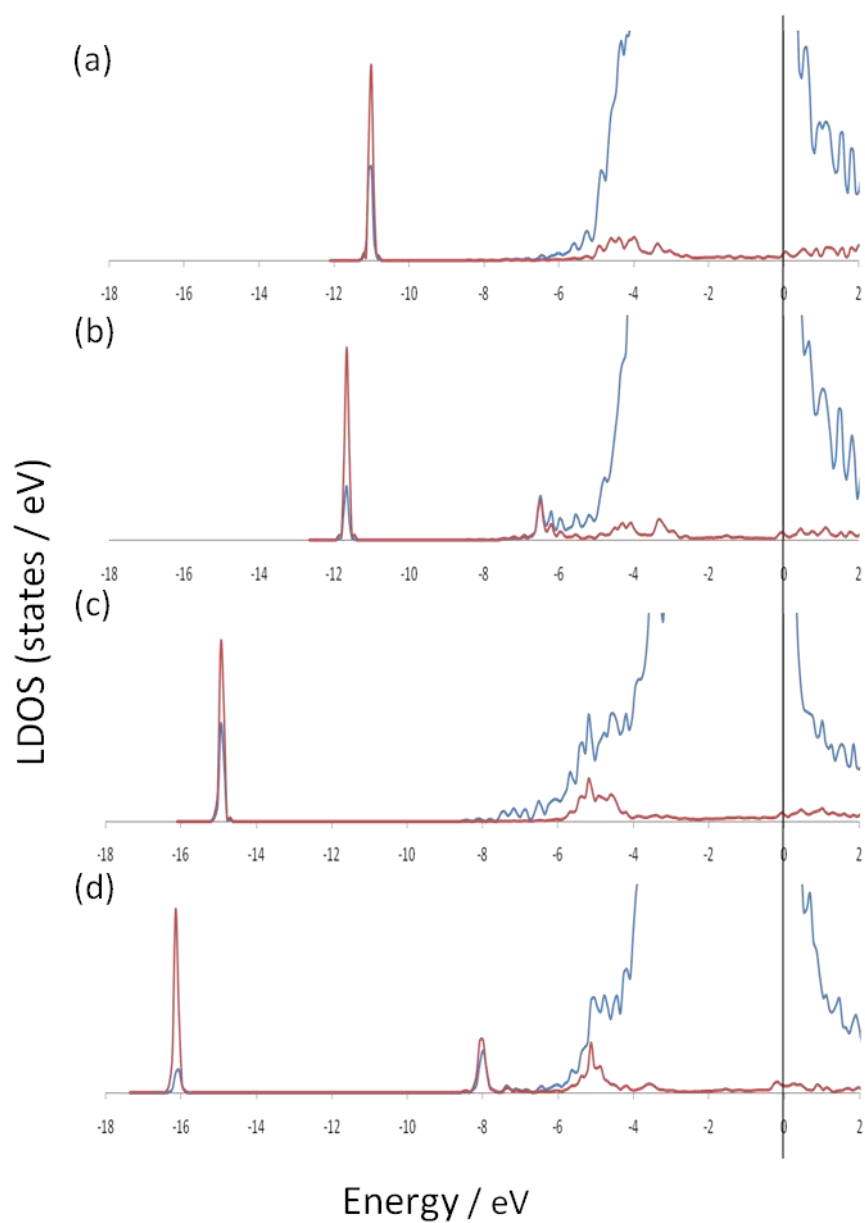

**Figure S3.** Local density of states (LDOS) for (a) C, (b) CH, (c) N, and (d) NH at fcc hollow site on Ni(111) surface. The blue and red lines represent d orbital of top layer Ni atoms and s and p orbital of C(N) atom, respectively.
